# Supplementary material for: Suppressing growth of lithium dendrites by introducing deep eutectic solvents for stable lithium metal batteries
Source: Royal Society of Chemistry journal article supplement (doi:10.1039/d2ta03253h), 2022-01-01
Supplement: d2ta03253h1.pdf [file d2ta03253h1.pdf]

## Supporting Information

### Suppressing Growth of Lithium Dendrites by Introducing Deep Eutectic Solvents for Stable Lithium Metal Batteries

Wentao Li, Wei Liu, Bendong Huang, Ziwei Cai, Hai Zhong,\* Fei Guo and Yaohua  
Mai\*

*Institute of New Energy Technology, College of Information Science and Technology, Jinan  
University, Guangzhou 510632, China*

\*Corresponding authors: [haizhong@jnu.edu.cn](mailto:haizhong@jnu.edu.cn); [yaohuamai@jnu.edu.cn](mailto:yaohuamai@jnu.edu.cn)

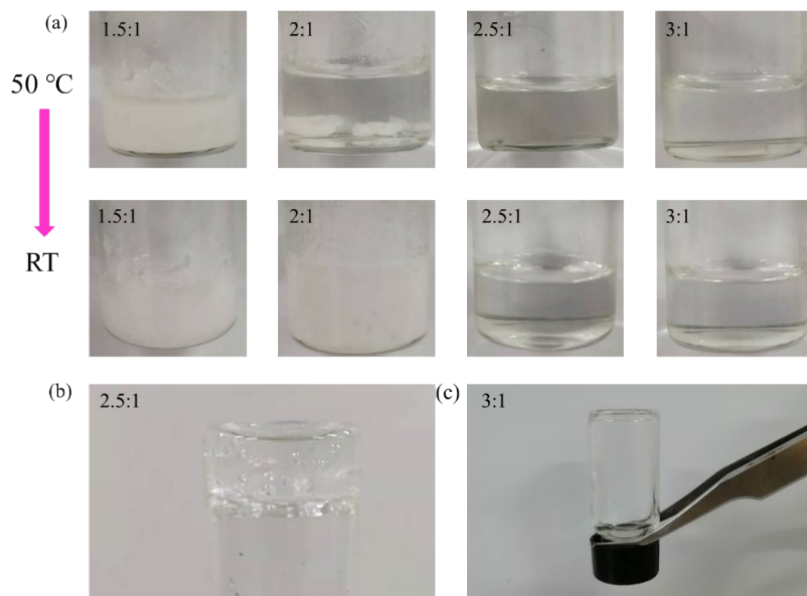

**Fig. S1** (a) The photograph pictures of binary mixtures with various molar ratios at 50 °C and cool-down room temperature; The state of binary mixtures with (b) 2.5:1 and (c) 3:1 ratio after 1 week at room temperature.

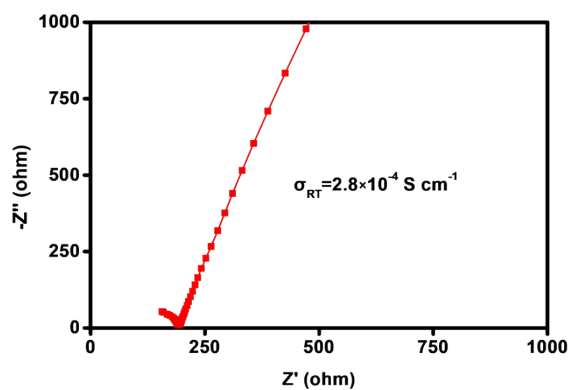

**Fig. S2** Impedance spectrum of DES-3:1 measured at 25 °C, and the total conductivity are calculated from this spectrum.

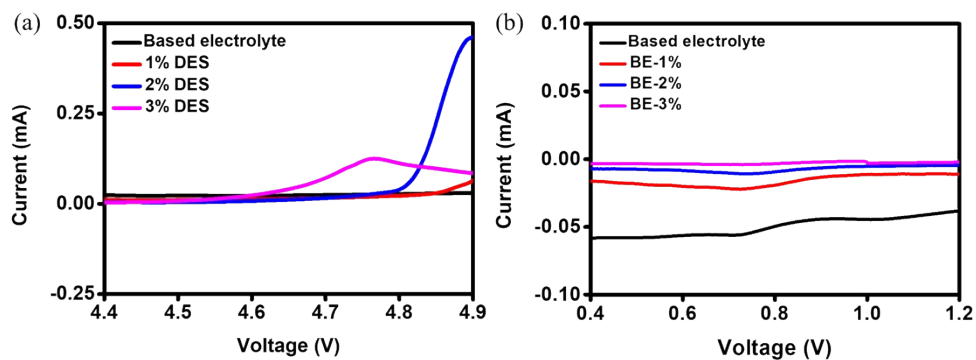

**Fig. S3** The corresponding magnified views of electrolyte decomposed at oxidation reaction regions (a) and reduction reaction regions (b) in Figure 2(a).

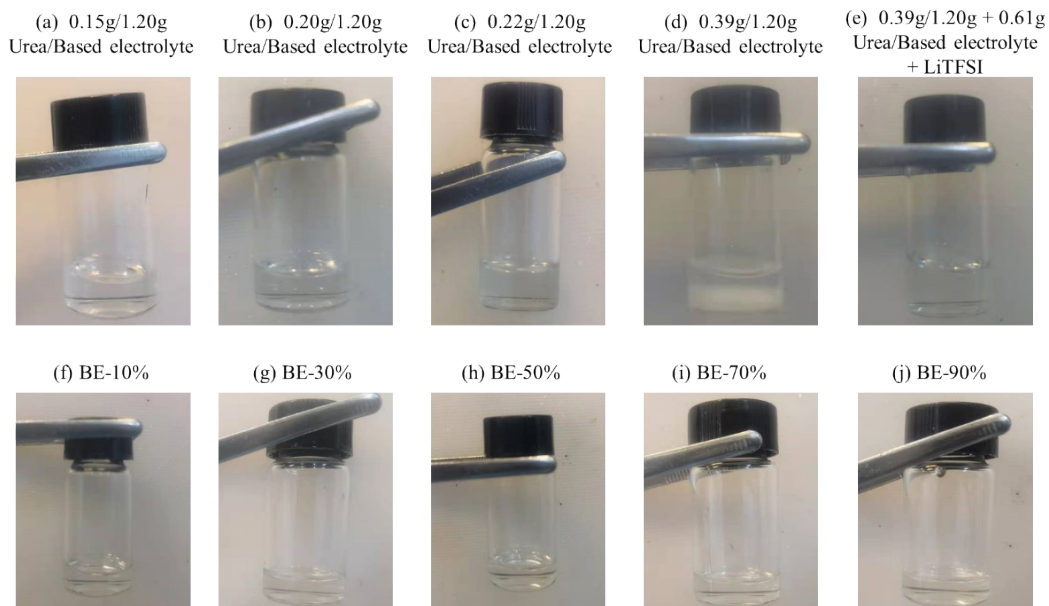

**Fig. S4** (a-d) The photographs of urea/based electrolyte with various ratios; (e) LiTFSI added into urea/based electrolyte mixture; (f-j) The photographs of DES-3:1/based electrolyte solution with various ratios.

**Table S1** The relative intensity ratios ( $I_{\text{peak1}}/I_{\text{peak2}}$  and  $I_{\text{peak3}}/I_{\text{peak4}}$ ) at different electrolyte.

|                   | $I_{\text{peak1}}/I_{\text{peak2}}$ ratios | $I_{\text{peak3}}/I_{\text{peak4}}$ ratios |
|-------------------|--------------------------------------------|--------------------------------------------|
| Based electrolyte | 1.160                                      | 2.453                                      |
| Urea-0.39%        | 1.199                                      | 2.434                                      |
| LiTFSI-0.61%      | 1.122                                      | 2.401                                      |
| BE-1%             | 1.128                                      | 2.008                                      |

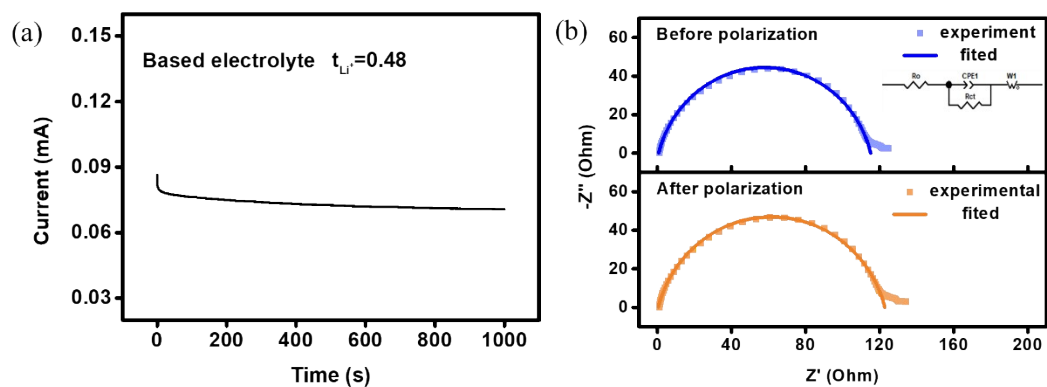

**Fig. S5** (a) Chronoamperometry profile of Li/Li symmetric cells with the based electrolyte; and (b) the corresponding Nyquist plots of Li/Li symmetric cells before and after polarization.

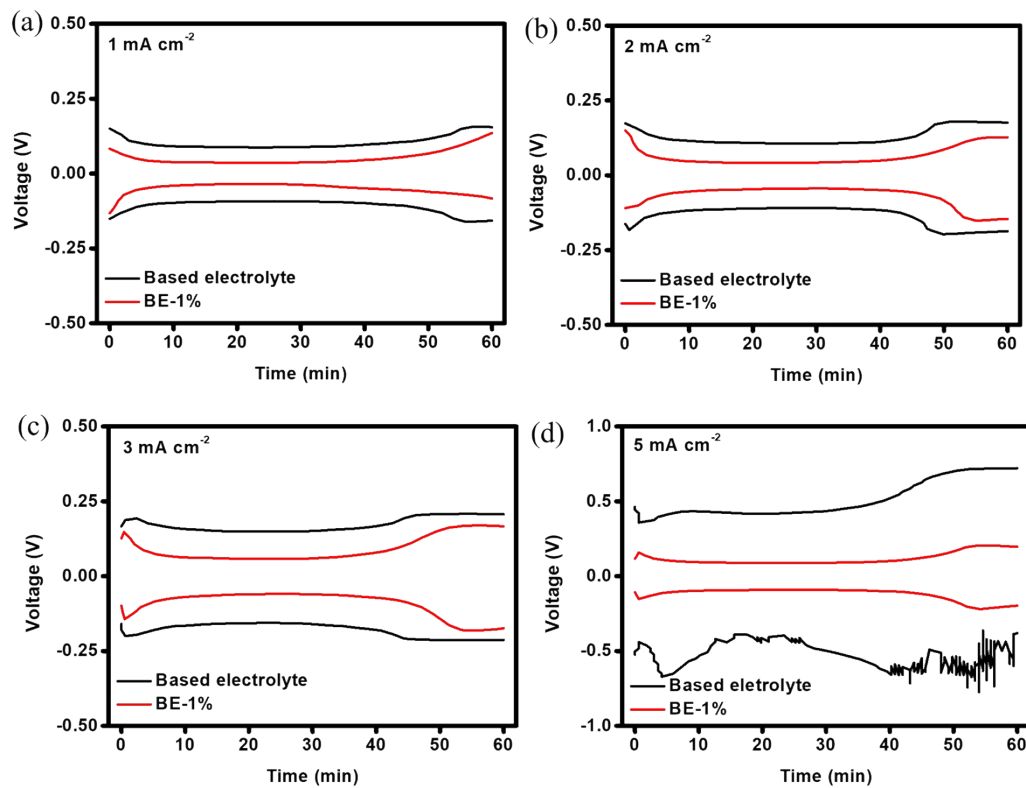

**Fig. S6** The corresponding 3<sup>rd</sup> cycle voltage vs. time profiles of symmetric cells at current density of 1, 2, 3 and 5 mA cm<sup>-2</sup> in figure 3e.

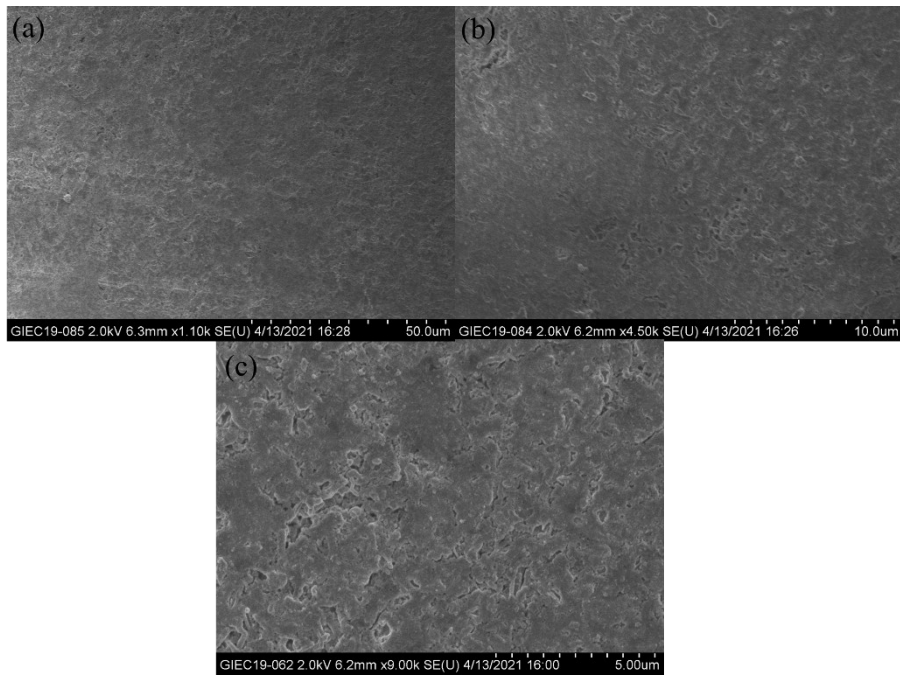

**Fig. S7** SEM images at the surface of Li anode with BE-1% electrolyte after 50<sup>th</sup> cycles under different magnifications: (a)  $\times 1100$ , (b)  $\times 4500$ , (c)  $\times 9000$ .

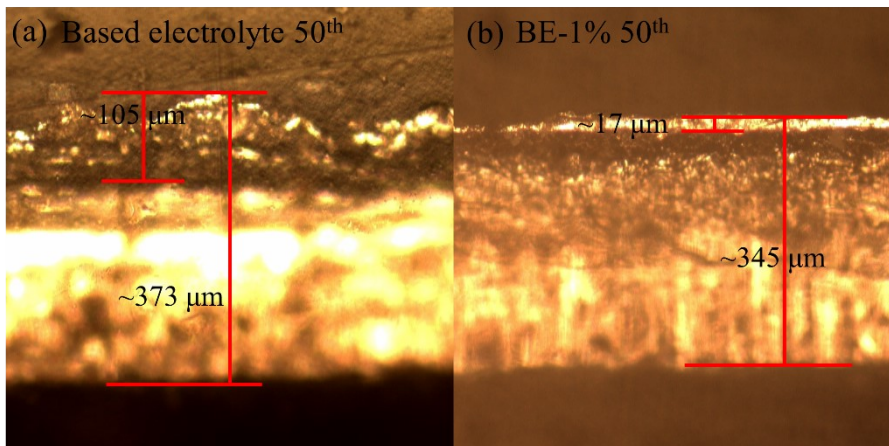

**Fig. S8** The cross-sectional optical microscopic images of lithium metal anodes in BE-1% and based electrolyte after 50<sup>th</sup> cycles ( $1\ \text{mA cm}^{-2}$ ,  $1\ \text{mAh cm}^{-2}$ ).

**Table S2** XPS surface element analysis parameters of Li anode with BE-1% after 50<sup>th</sup> cycles.

| Element       | Line Type | Apparent Concentration | k Ratio | wt.%   | wt.% Sigma | Atomic % | Standard Label   | Factory Standard |
|---------------|-----------|------------------------|---------|--------|------------|----------|------------------|------------------|
| C             | K series  | 1.27                   | 0.01274 | 15.87  | 0.13       | 20.20    | C Vit            | Yes              |
| N             | K series  | 0.61                   | 0.00108 | 1.78   | 0.15       | 1.95     | BN               | Yes              |
| O             | K series  | 22.31                  | 0.07506 | 78.37  | 0.20       | 74.85    | SiO <sub>2</sub> | Yes              |
| F             | K series  | 0.40                   | 0.00079 | 3.37   | 0.13       | 2.71     | CaF <sub>2</sub> | Yes              |
| P             | K series  | 0.14                   | 0.00081 | 0.60   | 0.02       | 0.30     | GaP              | Yes              |
| S             | K series  | 0.00                   | 0.00000 | 0.00   | 0.00       | 0.00     | FeS <sub>2</sub> | Yes              |
| <b>Total:</b> |           |                        |         | 100.00 |            | 100.00   |                  |                  |

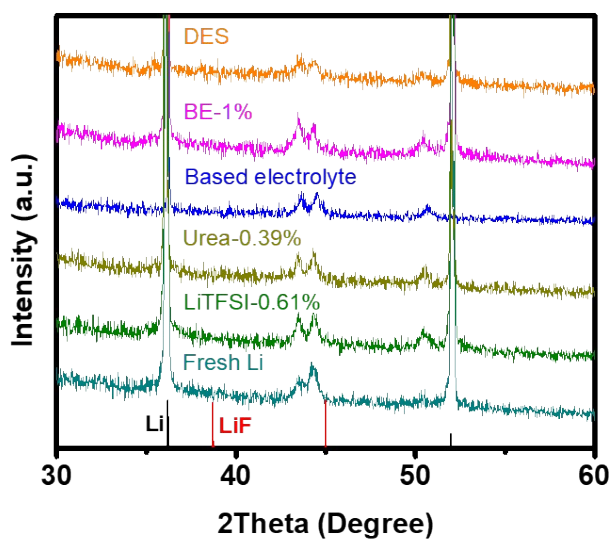

**Fig. S9** XRD of Li anode cycled in DES, BE-1% electrolyte, based electrolyte, Urea-0.39%, LiTFSI-0.61% electrolyte.

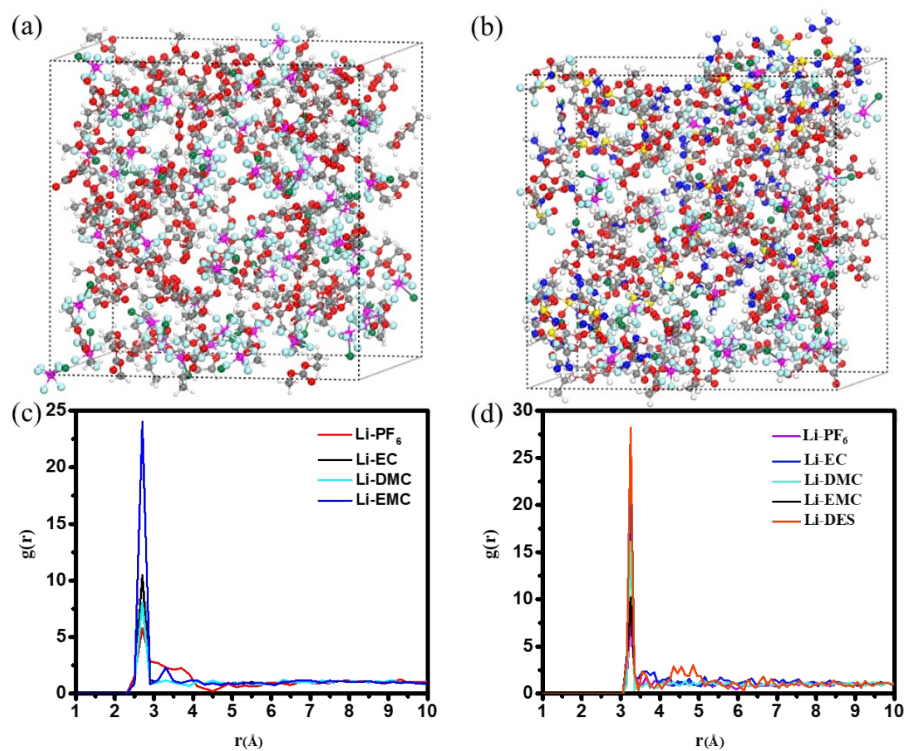

**Fig. S10** Snapshots of (a) based electrolyte and (b) BE-1% electrolytes obtained by MD simulation at 300 K; Radial distribution function for (c) based electrolyte and (d) BE-1% electrolytes.

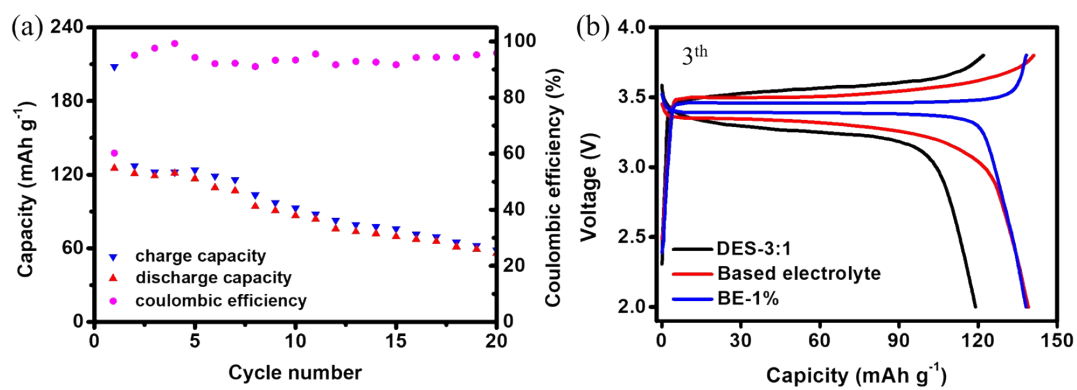

**Fig. S11** (a) The cyclic performance of Li/LiFePO<sub>4</sub> with pure DES as electrolyte at a current density of 30 mA g<sup>-1</sup>; (b) The corresponding charge/discharge profiles of three cells at 3<sup>th</sup> cycles.

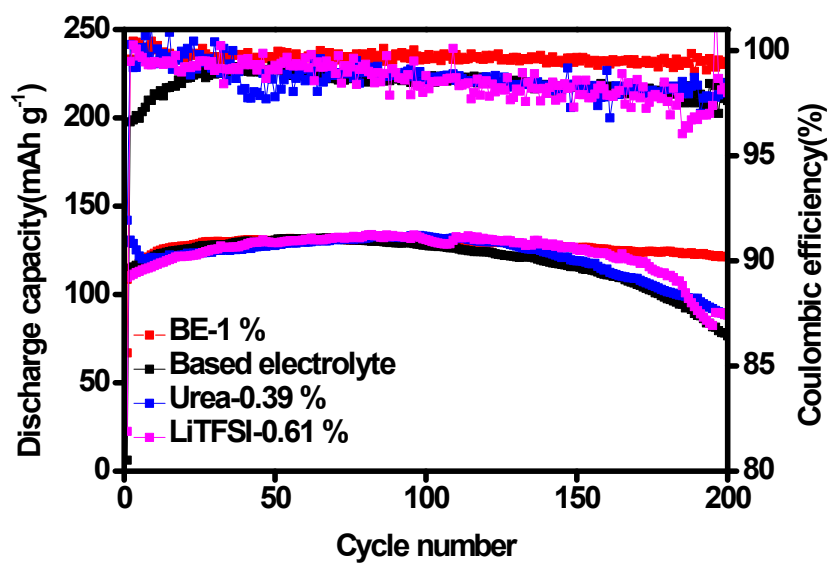

**Fig. S12** Long-term cycling of Li/LiFePO<sub>4</sub> cells (LiFePO<sub>4</sub> loading ~10 mg cm<sup>-2</sup>) in different electrolytes (BE-1%, based electrolyte, Urea-0.39%, and LiTFSI-0.61%). The cells were charged and discharged between 2.0 and 3.8 V at a current rate of 1C (1C = 150 mA g<sup>-1</sup>).
